# Supplementary material for: A molecular-level approach for characterizing water-insoluble components of ambient organic aerosol particulates using ultrahigh-resolution mass spectrometry
Source: Copernicus journal article supplement (doi:10.5194/acp-14-10299-2014), 2014-09-30
Supplement: Supplementary file 1 [file acp-14-10299-2014-supplement.pdf]

Supplement of Atmos. Chem. Phys., 14, 10299–10314, 2014  
<http://www.atmos-chem-phys.net/14/10299/2014/>  
doi:10.5194/acp-14-10299-2014-supplement  
© Author(s) 2014. CC Attribution 3.0 License.

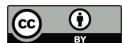

*Supplement of*

**A molecular-level approach for characterizing water-insoluble components of ambient organic aerosol particulates using ultrahigh-resolution mass spectrometry**

**A. S. Willoughby et al.**

*Correspondence to:* P. G. Hatcher ([phatcher@odu.edu](mailto:phatcher@odu.edu))

1 **Supplementary Table 1.** Percent area contributions from the major proton regions in the <sup>1</sup>H NMR spectra for the PSOM aerosol extracts.

2

| <b>Functional<br/>Group Region</b> | <b>Chemical<br/>Shift (ppm)</b> | <b>% <sup>1</sup>H NMR spectral area</b> |                            |                            |
|------------------------------------|---------------------------------|------------------------------------------|----------------------------|----------------------------|
|                                    |                                 | <b>16-17 August<br/>2011</b>             | <b>24-25 June<br/>2013</b> | <b>25-26 June<br/>2013</b> |
| H-C-O                              | 0.7 – 1.95                      | 2.5                                      | 2.5                        | 6.4                        |
| H-C-C=                             | 1.95 – 3.2                      | 18.3                                     | 21.0                       | 25.5                       |
| H-C                                | 3.2 – 4.4                       | 78.8                                     | 76.0                       | 67.0                       |
| <i>Calculated H/C</i>              |                                 | <i>1.98</i>                              | <i>1.98</i>                | <i>1.94</i>                |

3

4 **Supplementary Table 2.** Percent OC extraction for PSOM extracts using <sup>1</sup>H NMR and WSOM using TOC analysis.

5

| <b>Aerosol Sample</b> | <b>Initial OC<br/>mass (mg)</b> | <b>Spectral Area<br/>(intensity units)</b> | <b>**Calc DOC<br/>(mg)</b> | <b>%PSOC</b> | <b>%WSOC<br/>(by TOC)</b> |
|-----------------------|---------------------------------|--------------------------------------------|----------------------------|--------------|---------------------------|
| 16-17 August 2011     | *0.045                          | 2.4 x 10 <sup>10</sup>                     | 0.041                      | 90.3         | 37.0 ± 2.2                |
| 24-25 June 2013       | 0.039                           | 1.1 x 10 <sup>10</sup>                     | 0.021                      | 53.8         | 54.3 ± 3.8                |
| 25-26 June 2013       | 0.049                           | 9.1 x 10 <sup>9</sup>                      | 0.018                      | 36.5         | 60.3 ± 3.6                |
| Glucose               | 0.114                           | 2.5 x 10 <sup>9</sup>                      | -                          | -            | -                         |

6 \*There is a known error in the initial mass measurement of this aerosol, and was omitted from the results

7 \*\*Calculated by multiplying the spectral area by the glucose response factor (2.6x10<sup>11</sup> intensity units/mg H), and then converting mg H to mg C

8 using the H/C ratio calculated in Supplementary Table 1.

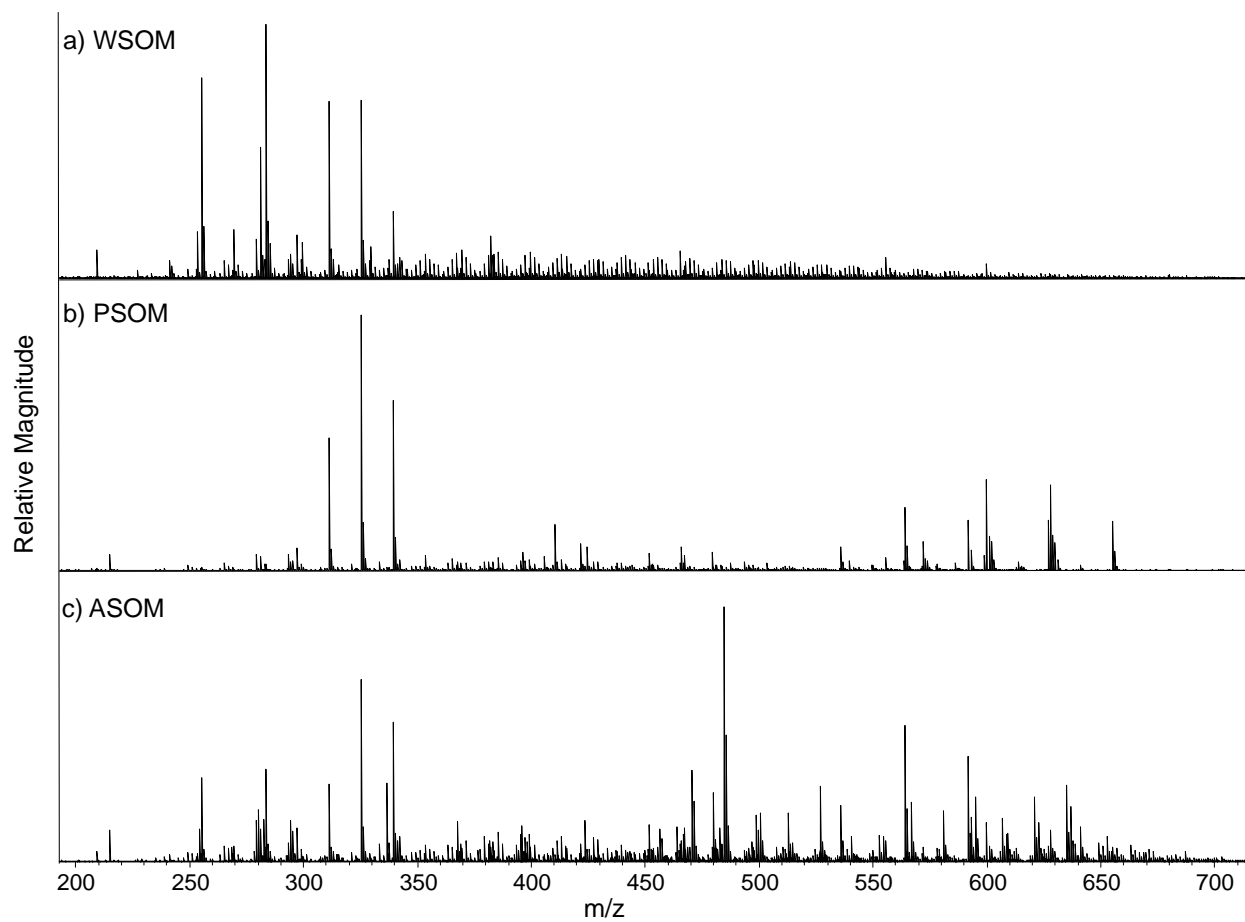

9  
10 **Supplemental Figure 1.** A representative full FTICR mass spectrum for each a) WSOM, b) PSOM, and c) ASOM.

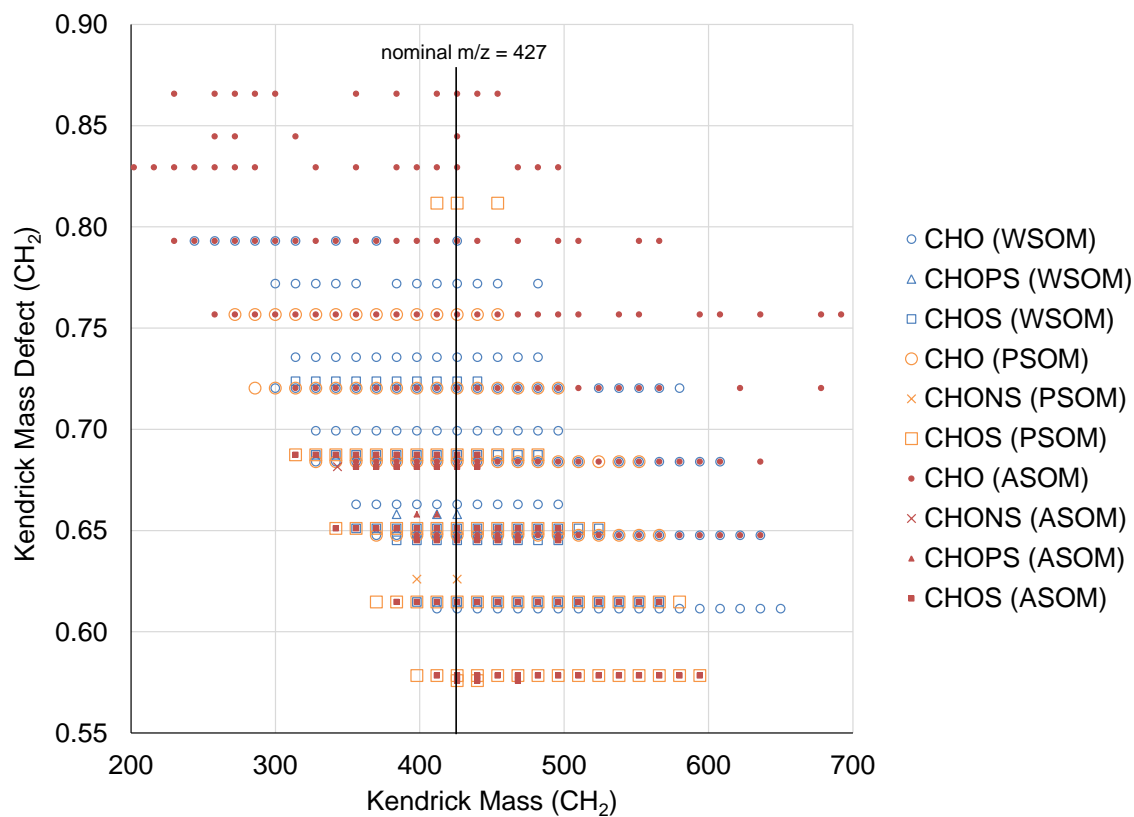

11  
 12 **Supplemental Figure 2.** Kendrick mass defect ( $\text{CH}_2$ ) plot for formulas identified at  $m/z=427$  in Figure 2 of the manuscript. The different colors  
 13 represent the different solvents, and the different shapes represent different formula types. A vertical line identifies the formulas at  $m/z=427$  in  
 14 Figure 2 of the manuscript.

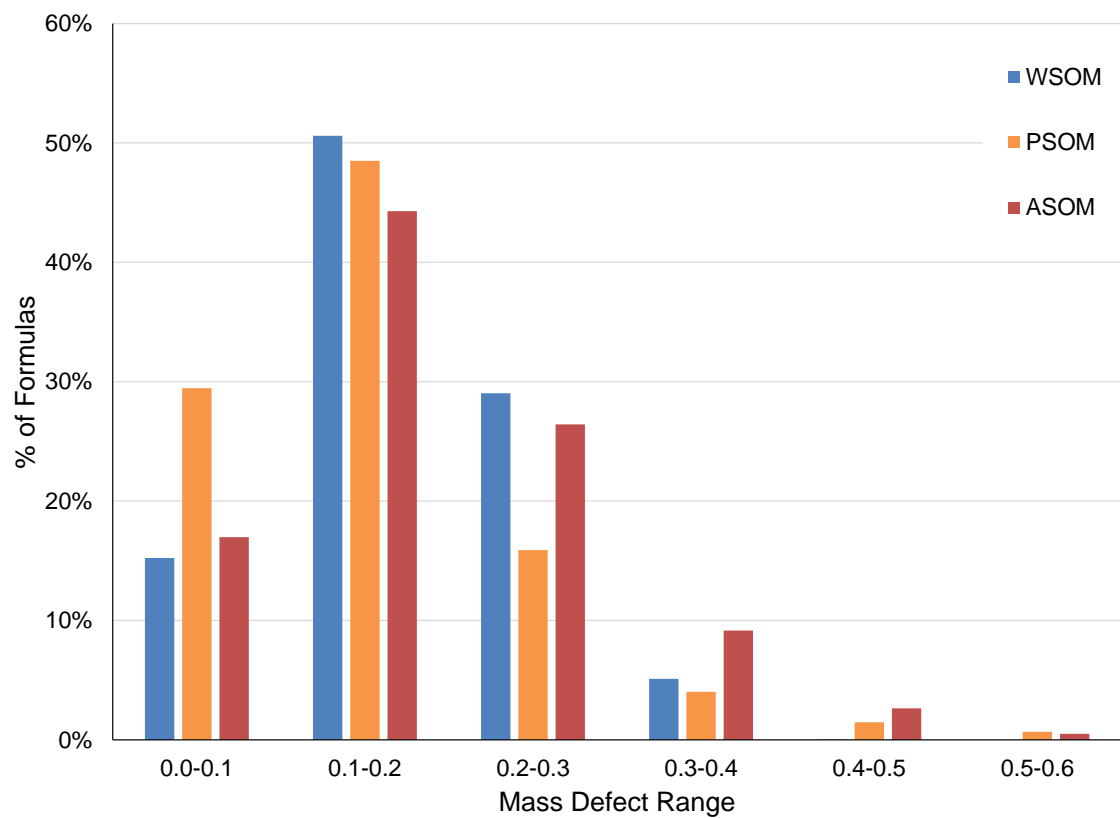

15  
 16 **Supplemental Figure 3.** The percentage of molecular formulas sorted by measured mass defect (the decimal value of the measured  $m/z$ ) for each  
 17 of the solvents.

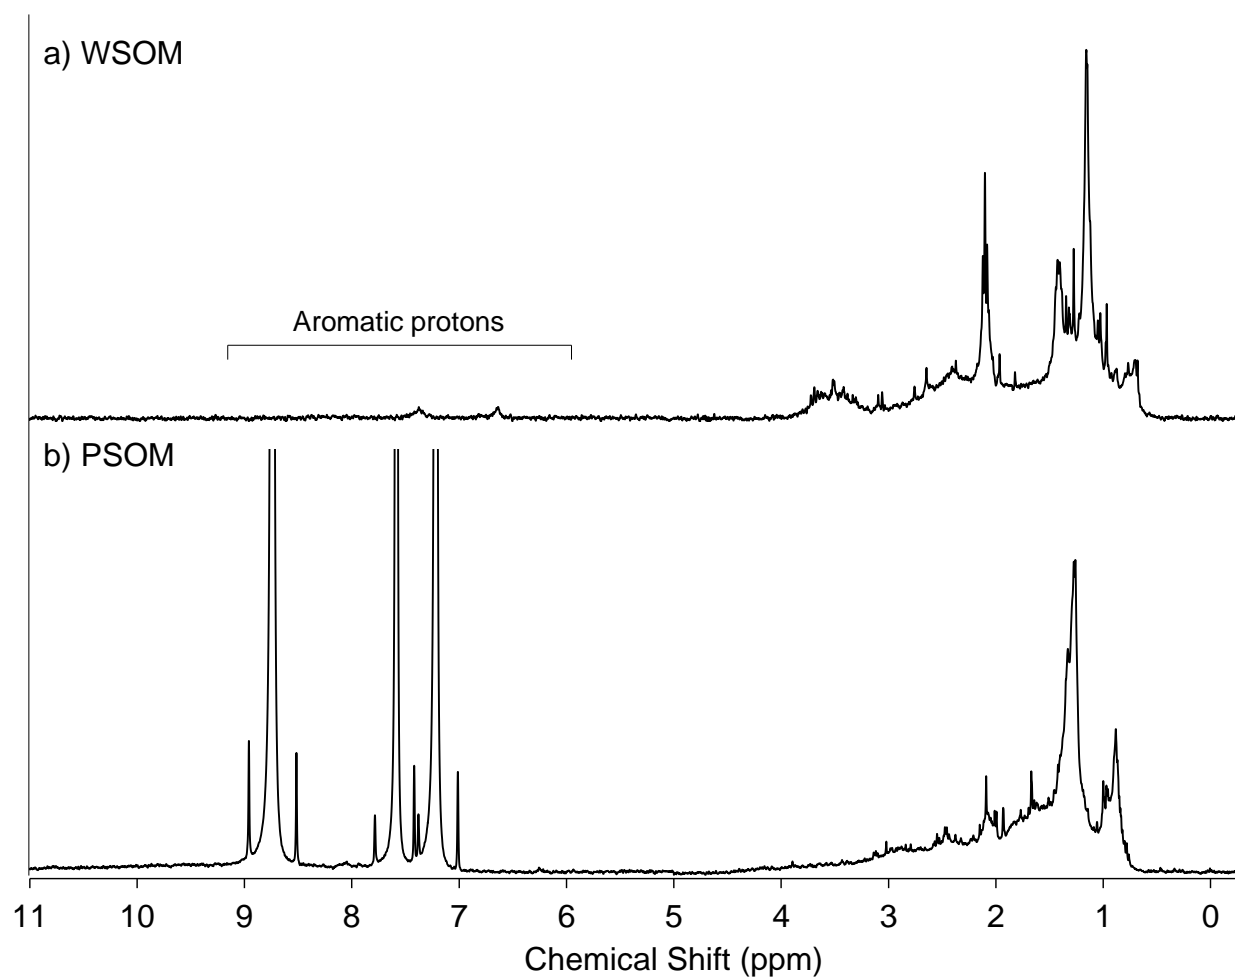

18

19 **Supplemental Figure 4.** Full  $^1\text{H}$  NMR spectra for a) WSOM and b) PSOM for the aerosol particulate sample collected 25-26 June  
20 2013. The strong signal (off scale) in the PSOM spectra in the aromatic region is from protons that have been exchanged in the  
21 pyridine- $\text{D}_5$  solvent, which overwhelms any possible aromatic signal from the sample.
